# Supplementary material
Source: MDPI journal article supplement (https://www.mdpi.com/2073-445X/11/10/1692)
Supplement: s1 [file s1]

**Table S1.** The cited publications since 2015 based on five grouped themes (\* review paper).

| Themes                                                                    | Cited Publications Since 2015                                                                                                                                                                                                                                                                                                                                                                                                                                                                                                                                                                                                                                                                                                    |
|---------------------------------------------------------------------------|----------------------------------------------------------------------------------------------------------------------------------------------------------------------------------------------------------------------------------------------------------------------------------------------------------------------------------------------------------------------------------------------------------------------------------------------------------------------------------------------------------------------------------------------------------------------------------------------------------------------------------------------------------------------------------------------------------------------------------|
| Land use–land cover (LULC) mapping and meta-analysis                      | Chaves et al. (2020) *; Feng and Li (2020); Foody (2020); Hasan et al. (2020); He et al. (2021); Nedd et al. (2021); Pandey et al. (2021) *; Saah et al. (2019); Parece and Campbell (2015) *; Yang et al. (2017); Li et al. (2017b); Saah et al. (2019).                                                                                                                                                                                                                                                                                                                                                                                                                                                                        |
| LULC mapping and remote sensing                                           | Ahmed et al. (2017); Bartsch et al. (2016) *; Chen et al. (2017); Chen et al. (2017b) *; Costa et al. (2018); Ghamisi et al. (2017a) *; Ghamisi et al. (2017b) *; Gómez et al. (2016) *; Hasan et al. (2019); He et al. (2017) *; Joshi et al. (2016) *; Li et al. (2017a); Li et al. (2015); MohanRajan et al. (2020) *; Navin and Agilandeeswari (2020) *; Phiri and Morgenroth (2017) *; Schmitt et al. (2020) *; Talukdar et al. (2020); Thyagarajan and Vignesh et al. (2019) *; Yan et al. (2015); Lv et al. (2015); Ma et al. (2017); MacLachlan et al. (2017); Maxwell et al. (2018) *; Toure et al. (2018); Yan et al. (2015); Zhang et al. (2020b); Zhang et al. (2017a); Zhang et al. (2017b).                        |
| LULC mapping and big data                                                 | Ai and Yang (2016); Andrade et al. (2020); Chen et al. (2021a); Chi et al. (2016) *; Comber and Wulder (2019); Copenhaver (2022); Deng et al. (2019) *; Fonte et al. (2017); Fritz et al. (2017); He et al. (2020) *; Hu et al. (2016); Huang and Wang (2020); Huang et al. (2020); Johnson and Iizuka (2016); Kang et al. (2018); Lee and Kang (2015); Li et al. (2016a) *; Liu et al. (2017); Liu et al. (2018b); Schultz et al. (2017); See et al. (2015) *; Shil et al. (2019); Sitthi et al. (2016); Traunmueller et al. (2015); Vargas-Munoz et al. (2020) *; Wu et al. (2020); Wu et al. (2021); Yang et al. (2017); Yi et al. (2020); Yin et al. (2021a) *; Yin et al. (2021b).                                          |
| LULC mapping and machine learning, including deep learning                | Adbi (2020); Alem and Kumar (2020) *; Bhosle and Musande (2019); Digra et al. (2022) *; Feizizadeh et al. (2021); Grekousis (2019) *; Helber et al. (2019); Heydari and Mountrakis (2019); Jamali (2020); Jozdani et al. (2019); Karra et al. (2021); Katharopoulos and Fleuret (2018); Kuras et al. (2021) *; Kussul et al. (2016); Laban et al. (2019); Li et al. (2019); Li et al. (2016b); Ma et al. (2019) *; Naushad et al. (2021); Nijhawan et al. (2019); Paoletti et al. (2019) *; Srivastava et al. (2019); Storie and Henry (2018); Talukdar et al. (2020) *; Vali et al. (2020) *; Wang et al. (2022) *; Yang et al. (2019); Zhang et al. (2016) *; Zhang et al. (2018); Zhang et al. (2021) *; Zhu et al. (2017) *. |
| LULC mapping and advanced cyberinfrastructure, especially cloud computing | Amani et al. (2020) *; de Sousa et al. (2020); Dubertret et al. (2022); Ferreira et al. 2020; Floreano and de Moraes (2021); Ghorbanian et al. (2020); Gorelick et al. (2017); Kumar and Mutanga (2018); Liu et al. (2018); Mou et al. (2021); Phan et al. (2020); Sugumaran et al. (2015); Tang et al. (2016); Tran et al. (2020); Wang et al. (2020); Wulder et al. (2018) *; Xia et al. (2019); Xie et al. (2019); Xing and Sieber (2016); Yang et al. (2017b); Yang et al. (2017c); Zhang et al. (2015); Zhang et al. (2020a).                                                                                                                                                                                               |
